# Supplementary material
Source: HighWire-hosted journal article supplement (https://jitc.bmj.com/content/11/7/e006921)
Supplement: inline-supplementary-material-1 [file inline-supplementary-material-1.pdf]

**Supplementary Figure 1**

**S1A.**

**FL**

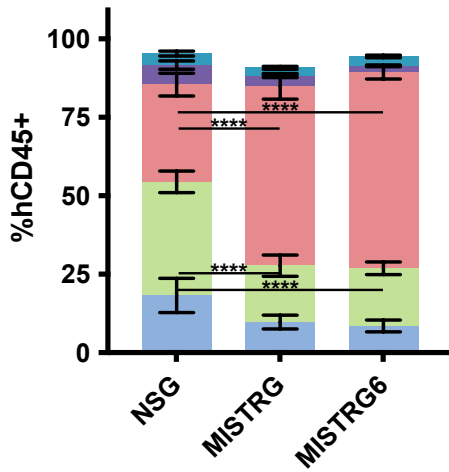

**S1B.**

**MPB**

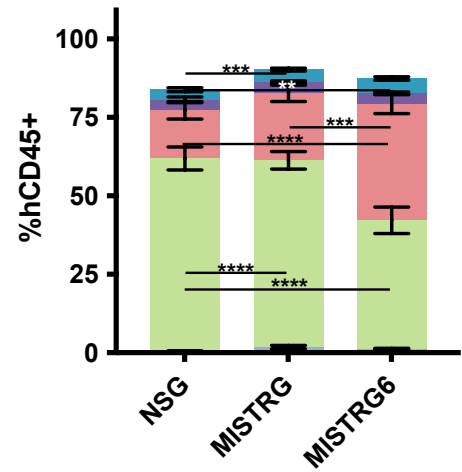

**S1C.**

**BM**

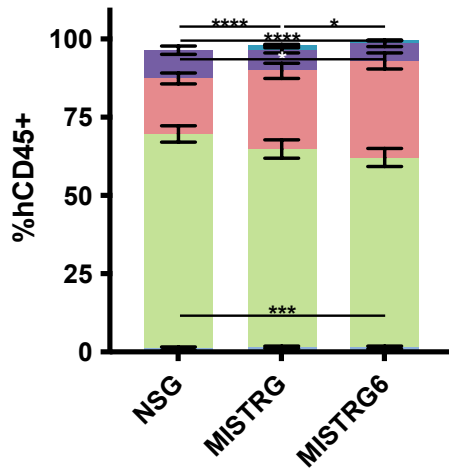

**S1D.**

**Spleen**

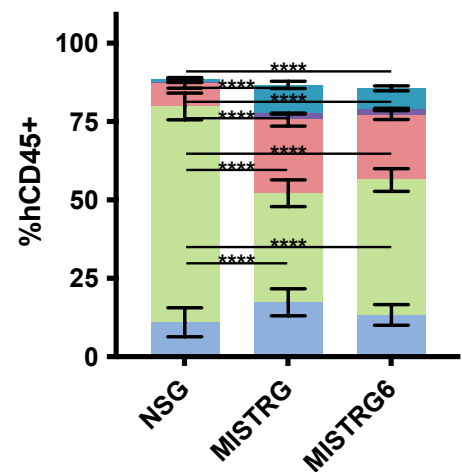

**S1E.**

**Liver**

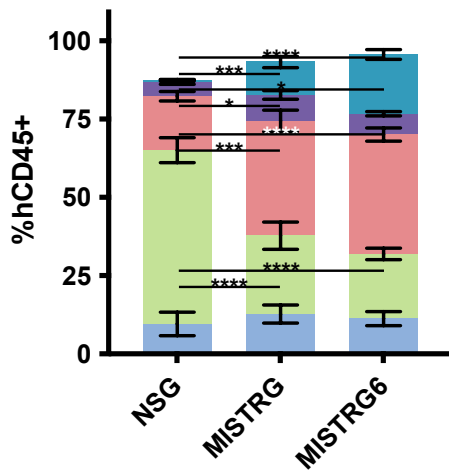

**S1F.**

**Lung**

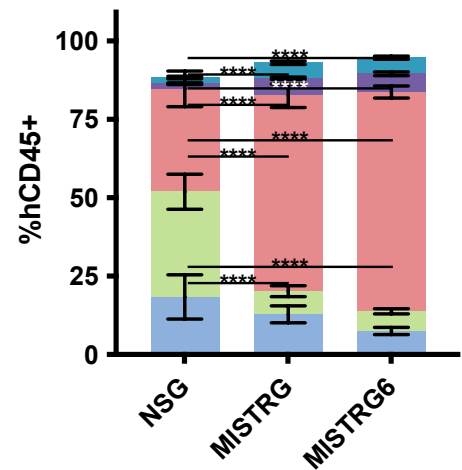

### Supplementary Figure 2

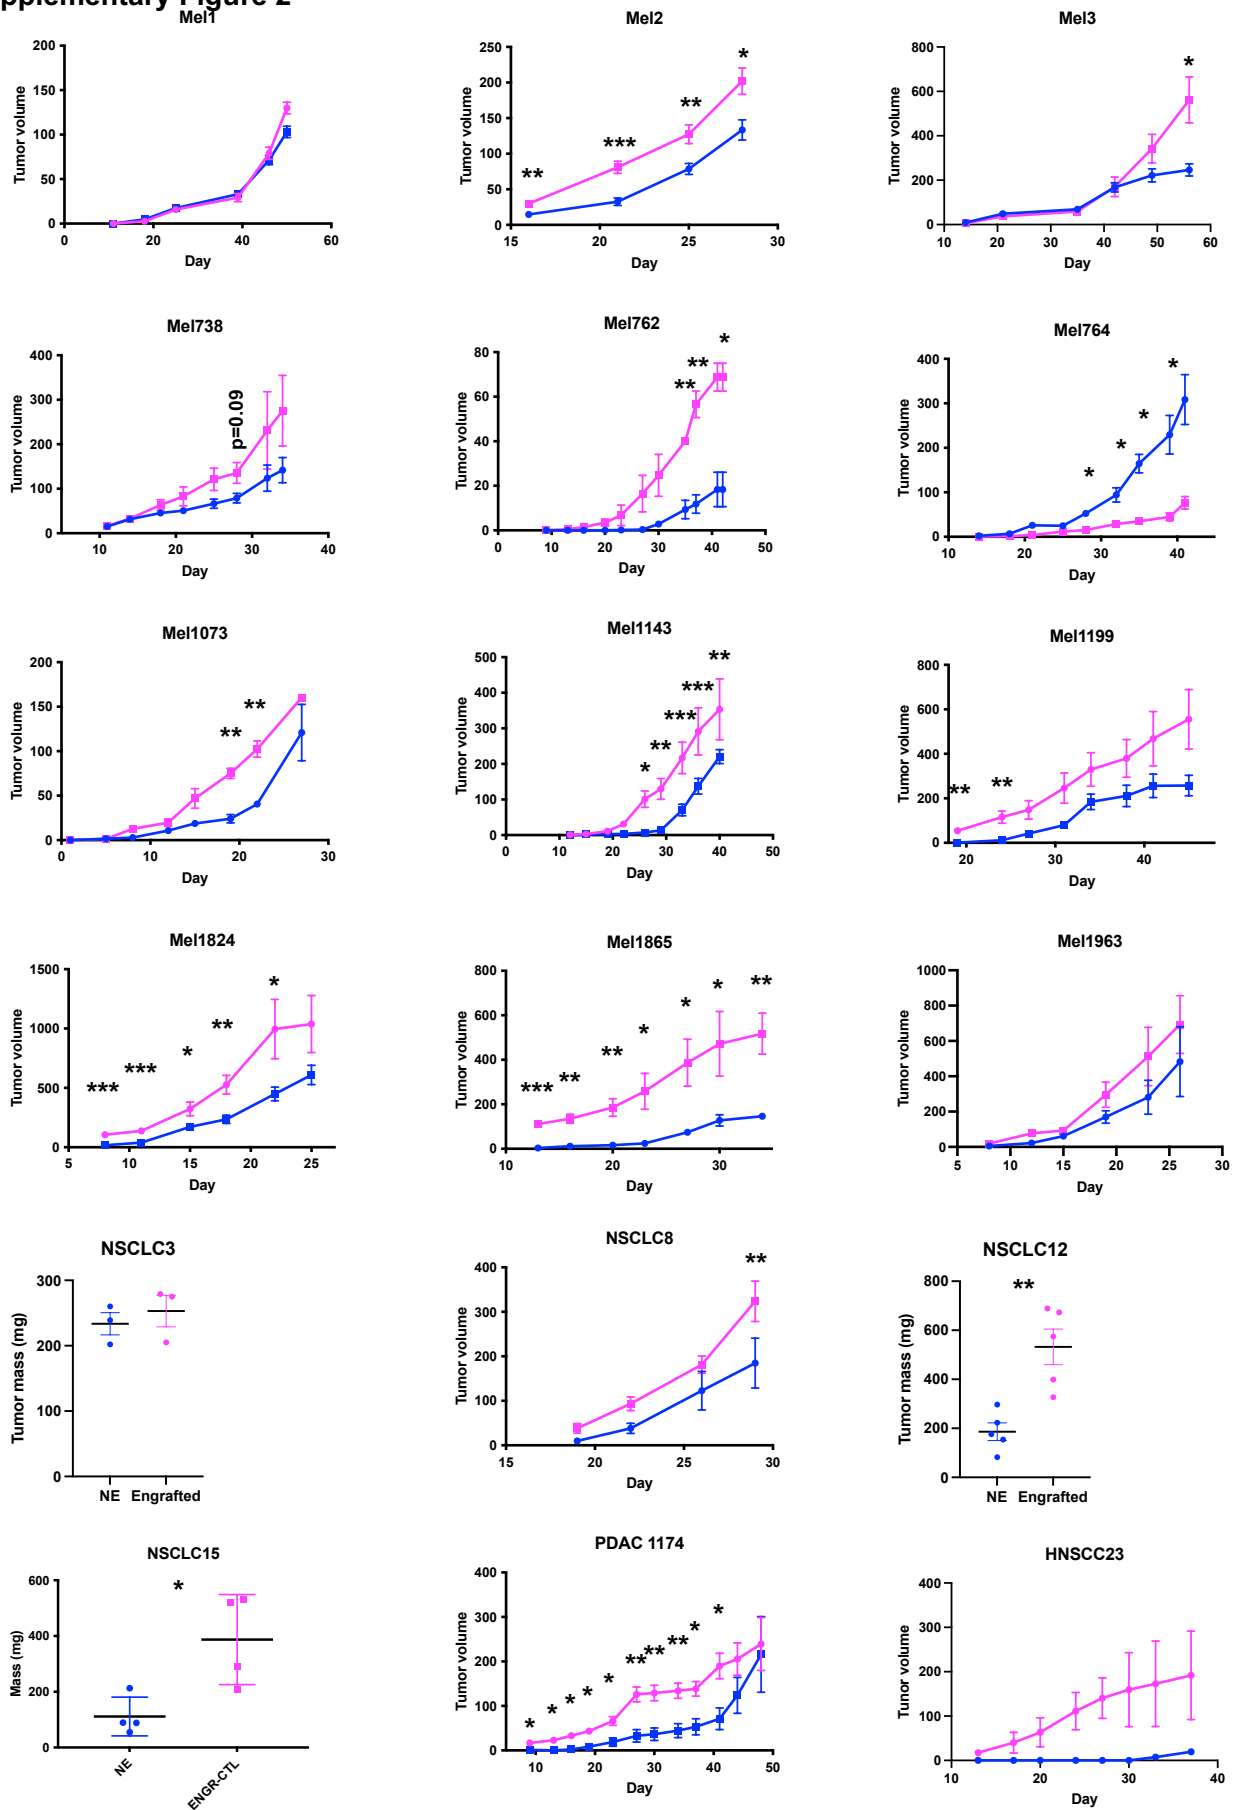

**Supplementary Figure 3**

**S3A.**

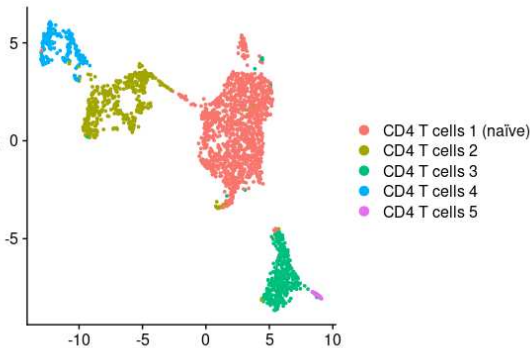

**S3B.**

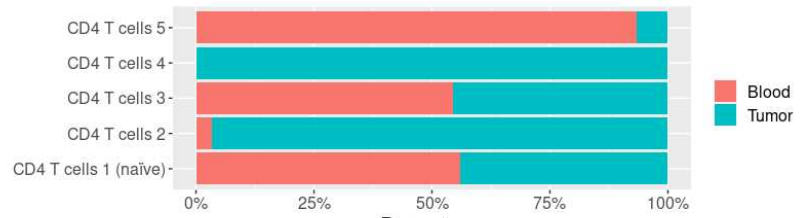

**S3C.**

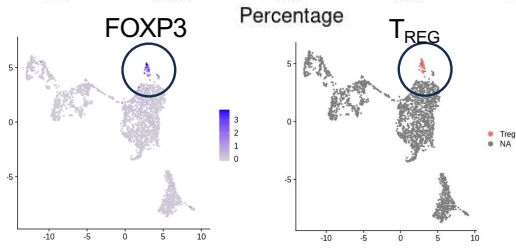

**S3D.**

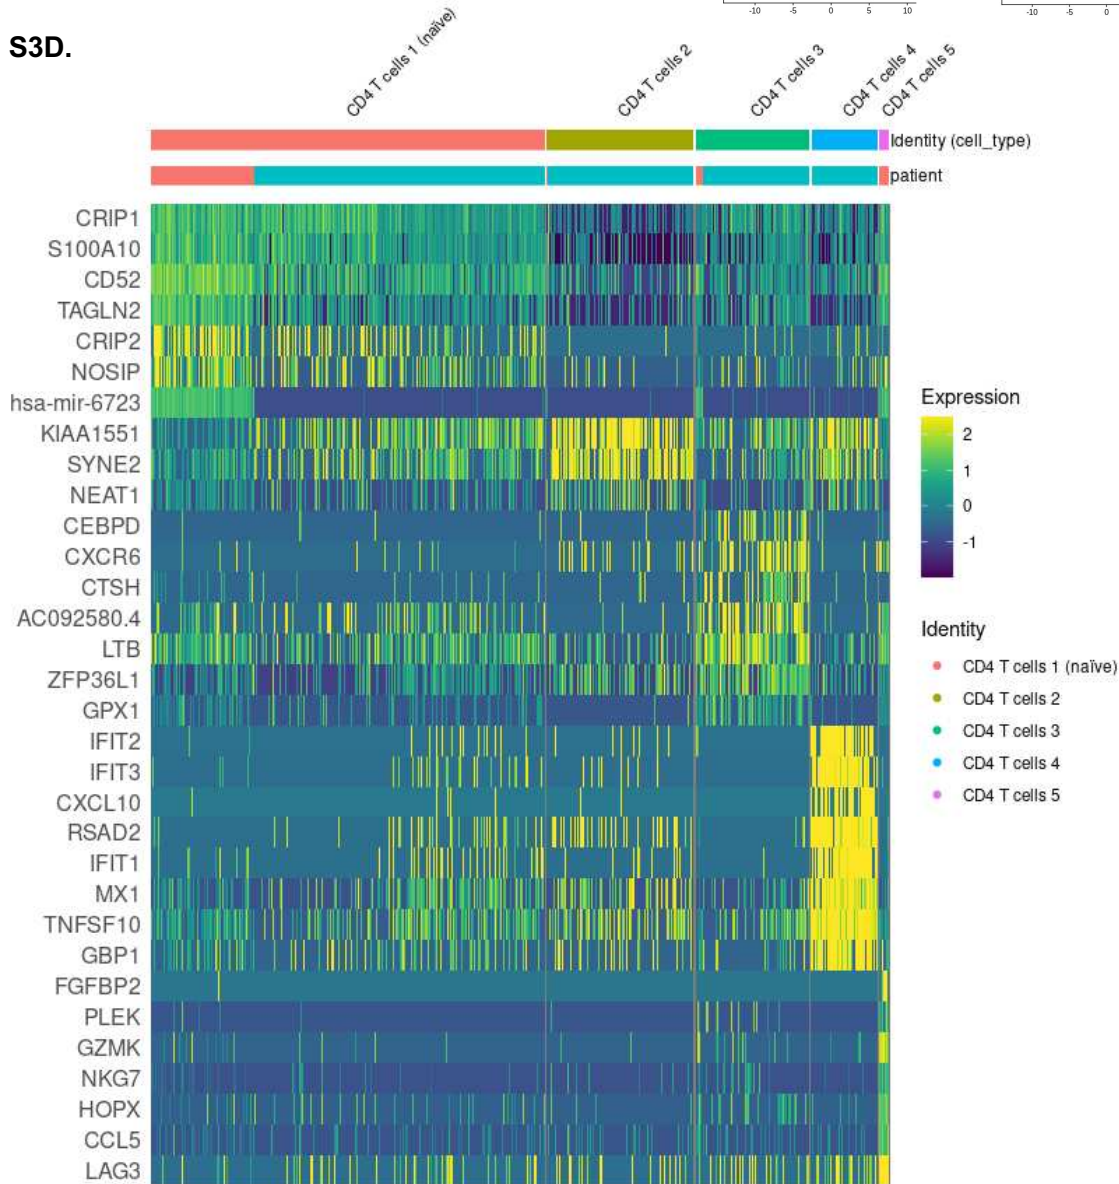

Supplementary Table 1

| Patient | Age | Sex | Tumor Type | Diagnosis                         | CD34+ cell # | PDX? |
|---------|-----|-----|------------|-----------------------------------|--------------|------|
| 1       | 65  | F   | NSCLC      | Stage IA adenocarcinoma           | <100k        |      |
| 2       | 73  | F   | NSCLC      | Stage IA adenocarcinoma           | 150k         |      |
| 3       | 82  | F   | NSCLC      | Stage IA squamous cell carcinoma  | 3.9 million  | Yes  |
| 4       | 56  | M   | NSCLC      | Stage IIB large cell carcinoma    | 4 million    |      |
| 5       | 70  | F   | NSCLC      | Mucoepidermoid carcinoma          | 5.1 million  |      |
| 6       | 57  | F   | NSCLC      | Adenosquamous carcinoma           | 7 million    |      |
| 7       | 70  | M   | NSCLC      | Stage IB adenocarcinoma           | 6.5 million  | Yes  |
| 8       | 62  | F   | NSCLC      | Stage IA adenocarcinoma           | 6 million    | Yes  |
| 9       | 79  | M   | NSCLC      | Stage IIA squamous cell carcinoma | 3.7 million  | Yes  |
| 10      | 71  | M   | NSCLC      | Stage IA adenocarcinoma           | 14 million   |      |
| 11      | 63  | F   | NSCLC      | Stage IA adenocarcinoma           | 8.2 million  |      |
| 12      | 79  | F   | NSCLC      | Stage IV squamous cell carcinoma  | 2.7 million  | Yes  |
| 13      | 54  | F   | NSCLC      | Stage II adenocarcinoma           | 5.0 million  |      |
| 14      | 57  | M   | NSCLC      | Stage IV NSCLC                    | 2.5 million  |      |
| 15      | 72  | M   | NSCLC      | Stage IV adenocarcinoma           | 3.6 million  | Yes  |
| 16      | 74  | M   | NSCLC      | Stage IV adenocarcinoma           | 3.4 million  |      |
| 17      | 73  | M   | NSCLC      | Stage IV neuroendocrine tumor     | 6.6 million  |      |
| 18      | 72  | F   | NSCLC      | Stage IV NSCLC                    | 4 million    |      |
| 19      | 79  | F   | NSCLC      | Stage IV NSCLC                    | 2.7 million  | Yes  |
| 20      | 78  | F   | HNSCC      | Stage II HNSCC of lateral tongue  | 1 million    | Yes  |
| 21      | 63  | F   | HNSCC      | Stage IVa HNSCC of buccal mucosa  | 2 million    | Yes  |
| 22      | 46  | F   | Melanoma   | Stage IV melanoma                 | 6 million    |      |
| 23      | 70  | F   | Melanoma   | Stage IIIc melanoma               | 250k         |      |
| 24      | 62  | M   | Melanoma   | Stage IV melanoma                 | 2.2 million  |      |
| 25      | 67  | M   | Melanoma   | Melanoma                          | 1.8 million  |      |
| 26      | 61  | M   | Melanoma   | Stage IIIc melanoma               | 100k         |      |
| 27      | 34  | M   | Melanoma   | Melanoma                          | 1.9 million  |      |
| 28      | 61  | F   | Melanoma   | Stage IV melanoma                 | 1 million    |      |
| 29      | 57  | M   | Melanoma   | Stage IV melanoma                 | 2.5 million  | Yes  |
| 30      | 55  | F   | Melanoma   | Melanoma                          | 2 million    |      |
| 31      | 42  | M   | Melanoma   | Stage IV melanoma                 | 4.8 million  | Yes  |
| 32      | 22  | M   | Melanoma   | Stage IIIc melanoma               | 3 million    |      |
| 33      | 52  | F   | Melanoma   | Stage IIb melanoma                | 4 million    | Yes  |
| 34      | 65  | M   | Melanoma   | Stage IV melanoma                 | n/a          |      |
| 35      | 71  | F   | Melanoma   | Melanoma                          | 500k         |      |
| 36      | 53  | M   | Melanoma   | Stage IIIc melanoma               | 600k         |      |
| 37      | 71  | M   | Melanoma   | Melanoma                          | 80k          |      |
| 38      | 65  | M   | Melanoma   | Stage IIIc melanoma               | 1.5 million  |      |
| 39      | 73  | M   | Melanoma   | Stage IIIb melanoma               | 3.4 million  |      |
| 40      | 65  | M   | Melanoma   | Stage IIIb melanoma               | 1.8 million  |      |
| 41      | 43  | F   | Melanoma   | Stage IIIc melanoma               | 3.6 million  |      |
| 42      | 50  | F   | Melanoma   | Stage IIIc melanoma               | 7 million    |      |
| 43      | 42  | M   | Melanoma   | Stage IIIc melanoma               | 3.6 million  | Yes  |
| 44      | 54  | F   | PDAC       | Pancreatic adenocarcinoma         | 1.2 million  |      |
| 45      | 48  | M   | PDAC       | Pancreatic adenocarcinoma         | 2.5 million  | Yes  |
| 46      | 48  | M   | Melanoma   | Stage IV melanoma                 | 2.1 million  | Yes  |
| 47      | 67  | M   | PDAC       | Pancreatic adenocarcinoma         | 1.6 million  | Yes  |
| 48      | 85  | F   | PDAC       | Pancreatic adenocarcinoma         | 6.8 million  | Yes  |
| 49      | 80  | M   | Melanoma   | Stage IIIc melanoma               | 1.95 million | Yes  |
| 50      | 75  | F   | Melanoma   | Stage IIIb melanoma               | 5.5 million  |      |
| 51      | 51  | M   | Melanoma   | Stage IIIc melanoma               | 8.5 million  | Yes  |
| 52      | 74  | M   | Melanoma   | Stage IV melanoma                 | 5 million    | Yes  |
| 53      | 35  | M   | Melanoma   | Stage IIIc melanoma               | 6.1 million  |      |
| 54      | 81  | M   | Melanoma   | Stage IIIb melanoma               | 3 million    |      |
| 55      | 63  | M   | Melanoma   | Stage IIIc melanoma               | 3.1 million  | Yes  |
| 56      | 35  | M   | Melanoma   | Stage IIIc melanoma               | 3 million    |      |
| 57      | 60  | M   | Melanoma   | Stage IV melanoma                 | 1.4 million  |      |
| 58      | 64  | F   | Melanoma   | Stage IV melanoma                 | 2.5 million  |      |
| 59      | 57  | M   | Melanoma   | Stage IIIc melanoma               | 4.5 million  |      |
| 60      | 51  | F   | Melanoma   | Stage IIIc melanoma               | 2.6 million  |      |
| 61      | 58  | F   | Melanoma   | Stage IV melanoma                 | 2.4 million  |      |
| 62      | 48  | M   | Melanoma   | Stage IIIc melanoma               | 1.76 million | Yes  |
| 63      | 68  | M   | Melanoma   | Stage IV melanoma                 | 4 million    | Yes  |
| 64      | 30  | M   | Melanoma   | Stage IIIc melanoma               | 12 million   |      |
| 65      | 79  | M   | Melanoma   | Stage III melanoma                | 2.8 million  | Yes  |
| 66      | 47  | M   | Melanoma   | Stage IIIc melanoma               | 2.4 million  |      |
| 67      | 42  | M   | Melanoma   | Stage IIIb melanoma               | 4.6 million  | Yes  |
| 68      | 83  | M   | Melanoma   | Stage IIIc melanoma               | 2.8 million  |      |
| 69      | 33  | M   | Melanoma   | Stage IIIc melanoma               | 4.8 million  |      |
| 70      | 58  | M   | Melanoma   | Stage IIIc melanoma               | 1.8 million  |      |
| 71      | 57  | F   | Melanoma   | Stage IIIc melanoma               | 820k         |      |

**Supplementary Figure Legends:****Supplementary Figure 1: MISTRG6 mice display robust peripheral blood and tissue engraftment of human cell types, including innate immune cells.**

**A.** Human hematopoietic cells in peripheral blood from mice of indicated strains engrafted with FL-derived CD34<sup>+</sup> cells, including T cells (hCD3<sup>+</sup>, blue), B cells (hCD19<sup>+</sup>, green), myeloid cells (hCD33<sup>+</sup>, red), neutrophils (hCD66b, SSC<sup>hi</sup>, purple), NK cells (hNKp46<sup>+</sup>, teal).

**B.** Human hematopoietic cell profiles in peripheral blood from mice of indicated strains engrafted with CD34<sup>+</sup> cells isolated from mobilized peripheral blood (MPB) of adult donors.

**C.** Human hematopoietic cell profiles in BM from mice of indicated strains engrafted with FL-derived CD34<sup>+</sup> cells.

**D.** Human hematopoietic cell profiles in spleen from mice of indicated strains engrafted with FL-derived CD34<sup>+</sup> cells.

**E.** Human hematopoietic cell profiles in liver from mice of indicated strains engrafted with FL-derived CD34<sup>+</sup> cells.

**F.** Human hematopoietic cell profiles in lung from mice of indicated strains engrafted with FL-derived CD34<sup>+</sup> cells.

**Supplementary Figure 2: Autologously-engrafted MISTRG6 mice support enhanced tumor growth in multiple patient models.**

Tumor growth curves for non-engrafted (blue) and autologously engrafted (magenta) PDX mice representing indicated patients; \* p<0.05, \*\* p<0.01, \*\*\* p<0.001, unpaired parametric t-test; bars indicate mean and S.E.M. Mel1 n=3 non-engrafted, n=8 engrafted; Mel2 n=13 non-engrafted, n=4 engrafted; Mel3 n=6 non-engrafted, n=5 engrafted; Mel738 n=3 non-engrafted, n=3 engrafted; Mel762 n=3 non-engrafted, n=3 engrafted; Mel764 n=3 non-engrafted, n=3 engrafted; Mel1073 n=4 non-engrafted, n=5 engrafted; Mel1143 n=5 non-engrafted, n=5 engrafted; Mel1199 n=8 non-engrafted, n=12 engrafted; Mel1824 n=6 non-engrafted, n=5 engrafted; Mel1865 n=4 non-engrafted, n=5 engrafted; Mel1963 n=5 non-engrafted, n=4 engrafted; NSCLC3 n=3 non-engrafted, 3 engrafted; NSCLC8 n=6 non-engrafted, n=6 engrafted; NSCLC12 n=5 non-engrafted, n=5 engrafted; NSCLC15 n=4 non-engrafted, n=4 engrafted; PDAC1174 n=4 non-engrafted, n=9 engrafted; HNSCC23 n=2 non-engrafted, n=3 engrafted.

**Supplementary Figure 3: Blood and tumor-resident CD4 T cells display distinct transcriptional states including naïve and interferon-responsive subtypes.**

**A.** Re-clustering of CD4 T cells reveals sub-structure of 5 clusters.

**B.** Cluster representation of CD4 T cell subclusters in tissues.

**C.** Expression of FOXP3 gene in a subset of CD4 T cells.

**D.** Heatmap indicating expression of top differentially expressed genes between each cluster, highlighting interferon activation signature of CD4 4 cluster.

**Supplementary Table 1.**

Clinical data of patients enrolled in prospective study collecting tumor and BM from solid tumor patients; indicated PDXs grew sufficiently for autologous humanized mouse modeling.
